# Supplementary material
Source: publisher figshare collection journal article supplement (https://gsapubs.figshare.com/ndownloader/files/34244225)
Supplement: Supplementary file 1 [file 34244225]

## Sheet: Sheet1
Table S3. Major and Trace Elements for the Igneous Samples from Longshou Shan								Wu, C., Li, J., Zuza, A.V., Haproff, P.J., Yin, A., and Ding, L., 2022, Paleoproterozoic–Paleozoic tectonic evolution of the Longshou Shan, western North China craton: Geosphere, v. 18, https://doi.org/10.1130/GES02491.1
Rock type	granite	granite	granite	granite	foliated granite	leucogranite	pink granitoid	granite	granite	granite	granite	granite	granite	granite	granite	granite	granite	granite
Samples	WC09-17-14(4b)	WC09-17-14(4a)	WC09-17-2014(2b)	WC09-16-14(3)	AZ09-16-14(5)	AZ09-16-2014(10)	WC09-15-14(4a)	THL09	THL10	THL12	THL13	THL14	THL15	THL16	THL17	THL18	THL19	THL20
Data sources	this study	this study	this study	this study	this study	this study	this study	S. Xue et al., 2017	S. Xue et al., 2017	S. Xue et al., 2017	S. Xue et al., 2017	S. Xue et al., 2017	S. Xue et al., 2017	S. Xue et al., 2017	S. Xue et al., 2017	S. Xue et al., 2017	S. Xue et al., 2017	S. Xue et al., 2017
Major elements (wt.%)
SiO2	74.44	75.33	64.844	74.67	79.55	76.621	74.59	69.46	70.44	69.71	71.46	72.14	71.85	70.82	73.16	71.25	72.92	71.23
TiO2	0.18	0.16	1.016	0.02	0.32	0.375	0.23	0.38	0.31	0.28	0.26	0.19	0.24	0.3	0.2	0.26	0.2	0.31
Al2O3	13.54	13.26	13.512	15.82	11.01	11.999	12.88	15.02	14.97	15.6	14.67	14.43	14.6	14.62	14.08	14.55	14.18	14.65
FeOT	1.3908	1.39589	12.1581	0.165718	0.166994	10.7967	2.21882
Fe2O3	0.99	0.54	/	0.03	0.48	/	0.91	2.41	1.89	2.03	2.02	1.41	1.6	2.32	1.45	2.1	1.54	2.22
FeO	0.5	0.91	3.88	0.14	0.9	2.14	1.4
MnO	0.02	0.02	0.096	0.01	0.01	0.035	0.03	0.03	0.03	0.02	0.03	0.02	0.04	0.03	0.02	0.03	0.02	0.03
MgO	0.27	0.21	0.838	0.13	0.7	1.153	0.68	0.84	0.69	0.61	0.58	0.44	0.49	0.75	0.43	0.63	0.47	0.65
CaO	1.21	0.55	2.151	0.37	0.66	0.916	0.87	2.14	1.85	2.03	1.7	1.44	1.74	2.14	1.53	1.71	1.68	1.84
Na2O	4.49	4.3	2.801	8.17	2.33	1.832	3.31	3.58	3.31	3.62	3.39	3.25	3.3	3.6	3.32	3.49	3.39	3.61
K2O	3.52	3.63	5.734	0.97	2.44	2.593	3.89	4.31	5.19	5.06	4.96	5.19	4.93	4.21	4.82	4.65	4.67	4.37
P2O5	0.04	0.04	0.336	0.05	0.13	0.073	0.03	0.117	0.097	0.087	0.078	0.053	0.067	0.106	0.049	0.083	0.058	0.086
LOI*	1.45	0.81	1.271	0.4	1.36	1.262	1.17	0.97	0.85	0.76	0.65	0.83	0.7	0.76	0.69	0.93	0.87	0.78
Total	102.1	100.8	99.464	100.01	100.78	99.942	99.99	99.45	99.85	100.06	99.99	99.57	99.8	99.84	99.92	99.85	100.16	99.94
A/CNK	1.46855	1.56368	1.26446	1.66351	2.02762	2.24658	1.59603	1.49751	1.44638	1.45658	1.4597	1.46053	1.46439	1.46935	1.45605	1.47716	1.45585	1.49185
Mg#	25.7085	21.146	19.4732	58.3044	88.1964	42.5578	35.3292
Trace elements (ppm)
Li	5.93	5.76	6.53132	0.65	10.8	13.8578	3.31
Be	2.16	2.09	0.955456	0.61	0.94	2.27577	1.51
Sc	2.26	2.53	14.4689	0.52	4.41	7.18322	4.06
V	4.68	7.31	26.4251	0.92	9.27	44.5528	23.9	28	23	20	19	13	15	25	13	21	16	23
Cr	2.85	2.27	2.42637	1.1	2.58	48.5594	5.94	10	10	10	10	20	10	10	10	10	10	10
Co	1.94	1.87	7.79957	0.19	1.32	6.71085	3.54
Ni	1.36	0.82	2.27027	0.08	2.3	22.1777	2.14
Cu	3.35	5.3	10.5245	1.51	0.71	12.113	14.5
Zn	28.6	28.9	70.1171	27.4	35.2	46.9132	27.2
Ga	14.7	15.3	20.2967	8.04	18	18.5185	15.9	17.8	16.8	17.8	15.9	15.8	15.8	17.3	15.2	17.2	16.7	16.8
Rb	112	118	123.375	19.8	112	111.302	159	108.5	117	116	125.5	120	109	106.5	115.5	129.5	122.5	125
Sr	56	63.1	215.023	217	91.2	142.291	206	405	403	420	315	303	390	376	297	311	299	314
Y	18.1	18.4	39.0889	1.18	24.1	17.5753	11.6	9.9	8	7	6.5	6.7	5.2	8.8	4.6	6.3	5.1	6.7
Zr	172	175	498.108	10.4	390	131.02	184	198	195	191	173	132	164	184	137	191	157	183
Nb	5.53	5.17	20.3683	0.65	10.6	8.11345	3.2	7.9	7.9	5.5	7.6	5.9	4.4	8	6	8.8	6.9	9.2
Cs	1.44	1.21	0.877252	0.14	1	2.20226	0.46	1.01	0.83	0.68	1.07	1.22	0.72	1.35	0.93	1.21	1.01	1.21
Ba	432	461	2295.52	255	626	473.527	809	1355	1775	1940	1445	1385	1930	1390	1385	1375	1295	1235
La	18.3	16.7	51.5972	6.61	407	26.9966	67.8	55.3	60.6	64.7	34	16	46.9	46.5	17.3	25.9	23.2	32.5
Ce	41.3	46.1	108.863	7.36	725	52.4432	121	97.4	99.3	113.5	48.8	33.4	89.2	83.3	28.9	29.2	38	45
Pr	4.04	3.94	14.4958	1.08	79.1	6.0084	11.5	10.05	10.55	11.2	6.31	3.02	8.3	8.46	3.26	4.99	4.21	5.95
Nd	15.2	15	60.3642	5.14	378	21.9031	42.1	34.7	35.6	37.9	21.1	10.8	28.7	29.5	11.3	17	14.9	20.8
Sm	2.95	2.87	10.1986	0.67	33.2	3.98517	5.61	5.32	4.79	4.95	3.52	1.9	3.79	4.04	1.79	2.27	2.16	3.37
Eu	0.39	0.4	3.71761	0.35	1.27	0.664645	1.25	1.02	1.01	0.89	0.61	0.52	0.79	0.78	0.53	0.52	0.54	0.62
Gd	2.69	2.54	8.98266	0.46	23	3.08769	3.95	3.22	2.6	2.74	2.03	1.39	1.91	2.45	1.13	1.55	1.22	1.92
Tb	0.43	0.4	1.32821	0.05	2.24	0.471295	0.45	0.4	0.36	0.28	0.26	0.2	0.22	0.34	0.15	0.2	0.17	0.26
Dy	2.55	2.67	7.62209	0.19	6.81	2.79422	1.95	1.97	1.69	1.37	1.34	1.08	0.91	1.53	0.86	1	0.93	1.36
Ho	0.56	0.58	1.37902	<0.05	0.83	0.522122	0.37	0.37	0.3	0.26	0.27	0.23	0.19	0.32	0.16	0.22	0.19	0.25
Er	1.75	1.83	3.87191	0.1	2.36	1.62093	1.25	0.98	0.86	0.76	0.63	0.62	0.51	0.88	0.48	0.65	0.53	0.76
Tm	0.28	0.3	0.574924	<0.05	0.14	0.245767	0.17	0.15	0.12	0.11	0.11	0.1	0.08	0.15	0.08	0.12	0.09	0.11
Yb	2.23	2.19	3.60253	0.07	0.84	1.60753	1.31	0.96	0.72	0.7	0.69	0.62	0.53	0.79	0.46	0.64	0.49	0.74
Lu	0.32	0.33	0.561908	<0.05	0.1	0.236159	0.21	0.15	0.11	0.11	0.09	0.09	0.1	0.14	0.08	0.11	0.09	0.09
Hf	5.47	5.53	10.6771	0.41	11.8	3.55564	5.59	5.4	4.9	4.8	4.5	3.8	4.1	4.7	4	5	4.5	4.8
Ta	0.65	0.62	0.820682	0.08	0.66	0.495055	0.13	0.5	0.5	0.3	0.6	0.5	0.3	0.6	0.4	0.5	0.4	0.7
Pb	5.54	6.39	7.50421	60.8	25.1	16.6593	15.6
Th	8.3	8.7	0.322773	1.01	204	10.6055	33.5	13.1	12.15	11.85	11.95	9.13	9.31	11.35	9.46	13.4	10.5	13.4
U	1.19	1.37	0.746354	0.28	10.4	1.87856	0.85	0.79	0.85	0.91	0.57	0.55	0.71	0.9	0.52	0.65	0.52	0.67
Rock type	granitic aplite	monzogranite	monzogranitic porphyry	monzogranitic porphyry	monzogranitic porphyry	monzogranitic porphyry	monzogranite	granite	granite	granite	granite	granite	monzogranite	Alkali-feldspar granite	quartz diorite	quartz diorite	quartz diorite	granodiorite	granodiorite
Samples	LSS12-05	LSS12-10	LSS12-04	LSS12-20	LSS13-26	LSS13-41	11CL928-2	2015H57	2015H58	2015H59	2015H60	2015H62	LSS12-02	17WAL-40	A02	A03	A04	A59	A17
Data sources	L. Tang, 2015	L. Tang, 2015	L. Tang, 2015	L. Tang, 2015	L. Tang, 2015	L. Tang, 2015	H. P. Qin, 2012	L. Q. Zhang et al., 2017	L. Q. Zhang et al., 2017	L. Q. Zhang et al., 2017	L. Q. Zhang et al., 2017	L. Q. Zhang et al., 2017	L. Tang, 2015	Z. Z. Wang et al., 2020	L. Q. Zhang et al., 2017	L. Q. Zhang et al., 2017	L. Q. Zhang et al., 2017	L. Q. Zhang et al., 2017	L. Q. Zhang et al., 2017
Major elements (wt.%)
SiO2	73.71	66.48	65.07	65.07	65.78	65.57	76.6	75.73	75.47	76.59	75.18	76.04	65.68	78. 03	61.77	6246	59.05	62.39	63.01
TiO2	0.12	0.53	0.57	0.3	0.09	0.1	0.1	0.08	0.11	0.1	0.13	0.09	0.87	0.07	0.7	0.82	1.02	0.8	0.72
Al2O3	13.33	15.67	15.98	14.11	15.18	16.76	12.7	13.09	12.94	12.29	12.74	12.52	14.27	12.46	18.29	17.16	18.92	17.13	17.22
FeOT	1.89273	3.78964	2.20273	3.13349	2.82383	3.36279	0.7499	11.7784	11.6434	11.0585	11.4635	11.2655	3.34774	0.548998	16.4573	15.4406	17.0242	15.4136	15.4946
Fe2O3	1.37	1.8	1.37	2.56	0.86	1.07	0.5						1.32	0.01
FeO	0.66	2.17	0.97	0.83	2.05	2.4	0.3						2.16	0.54
MnO	0.04	0.08	0.1	0.19	0.14	0.14	0	0.02	0.03	0.02	0.04	0.02	0.21	0.02	0.06	0.08	0.14	0.07	0.06
MgO	0.09	1.19	0.62	0.54	0.13	0.17	0.2	0.22	0.26	0.23	0.29	0.24	2.27	0.13	1.55	1.71	2.12	1.8	1.6
CaO	0.62	2.56	4.3	6.05	3.42	2.18	0.8	0.52	0.74	0.56	0.71	0.5	4.4	0.6	3.77	3.36	4	3.7	3.37
Na2O	4.34	4.88	6.24	7.06	7.37	6.41	3.8	3.46	3.6	3.36	3.52	3.49	3.63	3.79	5.14	4.64	5.83	4.58	4.51
K2O	5.21	3.2	2.91	2.16	2.78	3.19	4.4	4.71	4.57	4.54	4.62	4.37	2.89	4.17	3.29	3.7	2.32	3.56	4.05
P2O5	0.02	0.23	0.32	0.08	0.05	0.07	0.04	0.02	0.02	0.02	0.03	0.02	0.98	0. 01	0.31	0.34	0.39	0.34	0.3
LOI*	0.51	1.22	2.34	1.81	2.67	2.05	0.53	0.65	0.38	0.45	0.48	0.45	2.12	0.66	0.74	0.82	0.64	0.54	0.61
Total	100.01	100.01	100.77	100.74	100.52	100.11	99.9						100.8	101. 32
A/CNK	1.31072	1.47274	1.1881	0.924034	1.11864	1.42275	1.41111	1.50633	1.4523	1.45272	1.43955	1.49761	1.30678	1.45561	1.49918	1.46667	1.5572	1.44679	1.44342
Mg#	7.81374	35.8868	33.4101	23.4999	7.58387	8.2664	32.222	49.7618	41.0391	44.8622	40.6151	45.9171	54.7242	29.6812	44.1775	43.8374	44.3962	43.6679	44.2093
Trace elements (ppm)
Li														74.7
Be														11.7
Sc							1.9							3.76
V								4.7	5.4	4.3	7	5.3		2.3	53.6	62.1	69.3	65.6	58
Cr	2.57	7.33	7.29	5.1	1.42	2.29	19.6	1	3.7	3.4	4.7	3.5	10.7	1.6	11.7	13.4	16.6	15.7	12.7
Co							1.3							0.16
Ni							8.3							0.35
Cu								0.7	11.7	2.9	3.8	8.4		1. 26	11.6	5.28	2.63	10.5	8.9
Zn								16	17.7	15.7	22.9	15.8		33.6	60.4	66.4	96.3	70.2	64.3
Ga								15.5	15.6	14.6	16.3	15.7		20.8	21.1	22.3	25.3	20.8	20.3
Rb	207	64.4	13.4	5.96	48.6	93.4	252.5	217.8	228.2	237.6	254.9	230.4	45.9	359	80.1	116	105	85.3	86.2
Sr	32.9	505	211	191	123	119		31	49	35	41	39	686	15.9	988	753	608	866	822
Y	58.2	15.8	33.2	54.3	33	51.1	4.8	42.4	54.8	38	57.1	57	52.6	93.6	15.3	24.2	32.3	18.9	25.8
Zr							59.9	76	106	77	135	113		136	381	398	443	356	348
Nb	55.8	14.7	28.2	34.8	22	29	16.3	21.3	12.9	11.6	15.3	11.9	28	47.4	15.4	32.4	46.3	18.8	20.4
Cs							8.7	3.1	3.57	3.01	3.81	3.44		14.4	3.35	3.29	3.35	2.49	1.85
Ba	117	1176	423	94.4	1139	1929	258.8	161	212	156	212	208	1101	44.9	1888	1999	477	1829	2235
La	68.5	94.9	87.4	99.2	112	194	18.9	18.5	25.1	21.5	25.6	20	79.2	18.7	58	76.6	95.9	65.9	61.68
Ce	150	169	157	180	192	388	38.4	43	55.8	48.6	58.2	45.5	182	44.5	125	184	233	146	149.4
Pr	17.3	17	16.8	24.3	19.6	35.2	3.5	5.52	6.83	6.01	7.24	5.75	24	6.3	12.4	18.5	23.2	14.8	16.53
Nd	58.3	50.2	52.8	83.1	64.7	117	10.6	21.7	25.9	22.4	28.1	23.1	88	27.1	43.3	65.3	81	53.3	63.15
Sm	11.9	6.85	8.09	17.1	8.37	15.8	1.5	6.2	6.82	5.42	7.31	6.94	16	8.9	6.46	9.3	11.8	8.53	10.34
Eu	0.22	1.3	1.49	1.22	1.34	2.07	0.4	0.36	0.5	0.42	0.43	0.43	3.69	0.12	1.69	2.13	1.87	1.96	2.12
Gd	10.6	6.56	7.55	15.4	7.62	13.5	1.5	6.11	7.27	5.12	7.55	7.4	13.7	12.1	4.65	6.63	8.7	5.52	7.5
Tb	1.9	0.78	1.04	2.48	1.12	1.86	0.2	1.14	1.31	0.88	1.38	1.38	2.12	2.27	0.58	0.9	1.1	0.76	1
Dy	11.4	3.09	5.39	13	5.53	9.1	0.9	7.2	8.62	5.69	8.98	8.95	11.2	14.8	2.95	4.5	5.65	3.71	5.32
Ho	2.39	0.58	1.13	2.42	1.09	1.78	0.2	1.44	1.76	1.18	1.79	1.83	2.27	3. 08	0.53	0.77	1.02	0.67	0.89
Er	6.58	1.71	3.29	5.69	3.59	5.36	0.6	4.19	5.28	3.55	5.59	5.43	5.94	9.29	1.42	2.15	2.83	1.67	2.23
Tm	1.25	0.26	0.63	0.84	0.66	0.9	0.1	0.66	0.83	0.6	0.88	0.86	0.99	1.36	0.21	0.33	0.45	0.22	0.3
Yb	7.49	1.6	4.17	4.67	4.6	6.14	0.8	4.13	5.31	3.73	5.6	5.39	5.8	9.2	1.23	2.18	2.99	1.42	1.9
Lu	0.9	0.21	0.56	0.54	0.79	1.04	0.2	0.58	0.75	0.56	0.81	0.79	0.68	1.36	0.18	0.34	0.43	0.21	0.28
Hf	23.6	11.5	12.3	17	9.5	12.1	3.1	3.19	3.95	3.22	5.16	4.57	6.67	7. 14	8.01	8.7	9.78	7.31	7.38
Ta	4.94	1	1.5	1.4	1.5	1.6	1.5	2.03	2.69	3.07	3.32	3.22	1.85	4.1	0.92	2.34	3.31	1.26	1.6
Pb	54.1	35.7	47.5	192	30.3	48.6	39.4	30.4	29.7	27.8	32.3	31.9	23	34.9	20	22.1	19.6	18.6	20.4
Th	42.6	58.9	47.9	59.1	27.7	52.3	35.4	26.1	33.6	21.8	31.9	27.8	21.5	45.9	9.7	16.4	19	10.3	9.74
U	11.3	7.23	44.3	975	9.47	19.8	4.7	3.14	3.9	3.56	4.14	6.57	7.8	4.18	2.71	3.19	3.14	2.36	2.35
Rock type	granodiorite	granodiorite	syenite	syenite	syenite	syenite	syenite	monzogranite	granodiorite	granodiorite	granodiorite	granodiorite	granodiorite	quartz monzonite	quartz monzonite	quartz monzonite
Samples	A19	A20	ZKG74-1-1	ZKG74-1-3	ZKG74-1-4	ZK-1	ZK-2	LSS12-03	2015H49	2015H50	2015H51	2015H52	2015H53	11CL934-2	11CL934-5	11CL935-2
Data sources	L. Q. Zhang et al., 2017	L. Q. Zhang et al., 2017	Z. Q. Zhang et al., 2018	Z. Q. Zhang et al., 2018	Z. Q. Zhang et al., 2018	Z. Q. Zhang et al., 2018	Z. Q. Zhang et al., 2018	L. Tang, 2015	L. Q. Zhang et al., 2017	L. Q. Zhang et al., 2017	L. Q. Zhang et al., 2017	L. Q. Zhang et al., 2017	L. Q. Zhang et al., 2017	H. P. Qin, 2012	H. P. Qin, 2012	H. P. Qin, 2012
Major elements (wt.%)
SiO2	61.26	65	61.87	66.07	59.69	65.41	62.06	61.46	65.47	66.15	66.44	67.78	67.27	75.1	75.5	76.8
TiO2	0.95	0.63	0.53	0.46	0.7	0.4	0.55	0.41	0.47	0.48	0.41	0.35	0.41	0.1	0	0.1
Al2O3	17	16.61	17.81	16.54	18.02	16.86	17.71	15.95	16	15.58	15.52	15.68	15.24	13.6	14	12.3
FeOT	15.2966	14.9457	16.0254	14.8827	16.2144	15.1706	15.9355	3.13281	14.3968	14.0189	13.9649	14.1089	13.713	0.98998	0.86994	1.05992
Fe2O3								0.97						0.1	0.3	0.4
FeO								2.26						0.9	0.6	0.7
MnO	0.08	0.09	0.07	0.06	0.1	0.05	0.07	0.09	0.06	0.07	0.06	0.05	0.06	0.1	0	0
MgO	2.06	1.39	0.89	0.76	1.32	0.71	0.93	1.01	1.74	1.79	1.58	1.27	1.59	0.1	0.1	0.2
CaO	3.77	2.6	1.68	1.21	3.68	2.11	2.36	2.37	3.57	3.31	2.91	2.87	3.01	0.4	0.3	0.6
Na2O	4.53	4.99	5.34	5.09	4.72	4.97	4.81	3.9	3.87	3.68	3.48	4	3.67	3.5	3.6	3.6
K2O	3.41	4	6.4	5.69	5.33	5.07	5.86	4.42	2.82	3.08	3.83	3.08	3.2	5	4.3	4.6
P2O5	0.39	0.24	0.17	0.14	0.27	0.16	0.21	0.2	0.23	0.23	0.21	0.18	0.22	0.17	0.19	0.03
LOI*	1.05	0.66	1.71	1.18	1.93	1.55	1.22	0.92	0.85	0.9	0.97	1.09	0.7	0.85	1.02	0.59
Total								99.96						99.9	99.9	99.9
A/CNK	1.45175	1.43313	1.32712	1.37948	1.31245	1.38765	1.35917	1.49205	1.55945	1.54717	1.51859	1.57588	1.54251	1.52809	1.70732	1.39773
Mg#	44.9396	43.8224	34.2811	34.7262	38.4273	34.588	34.6155	36.495	48.6384	49.8317	51.0606	49.1782	50.6419	15.2584	17.0058	25.1695
Trace elements (ppm)
Li
Be
Sc														3.9	3.5	4.6
V	73	49.1	35	30	57	27	42		58.1	54.9	49.2	41.1	55.6
Cr	14.1	9.8	3	2	3	3	3	10.2	19.7	19.9	20.5	14.7	20.6	19.8	17.6	20.9
Co			4.2	3.5	6.1	3.4	4.7							1	0.6	1.3
Ni			2	2.5	2.5	2.4	3							7.8	7.4	8.2
Cu	14.2	4.8							7.39	8.13	5.57	6.23	6.3
Zn	77.5	68.6	51	43	64	39	56		51.4	52.2	44	39.7	49.7
Ga	20.8	20.4	18.7	17.9	20.9	20.7	20.7		20.2	19.9	18.9	19.2	18.9
Rb	84.8	93.3	146	151	135	164	160	111	108.3	102.9	121.5	124.9	123.9	386.2	423.1	219.2
Sr	866	629	513	455	915	569	806	458	787	763	747	702	735
Y	24.5	26.4	27.4	25	29	20.5	29.1	16.5	12.8	12.9	14.4	11	12.7	17.1	9.4	35.1
Zr	448	294	549	432	583	352	506		181	169	158	156	146	54.6	24.5	106.3
Nb	24	26.2	35.7	32.3	37.5	29.7	35.8	15.1	12.3	13.5	15.9	12.8	14.6	23	37.2	23.2
Cs	2.5	1.85	1.78	3.24	3.09	3.4	3.3		5.03	3.76	3.17	8.28	3.52	15.6	17.5	4.3
Ba	1895	1456	1445	1240	1595	1255	1830	1623	1047	1096	1111	776	958	111.1	12.7	208
La	72.3	53.6	179	131	143	110	139	108	42.5	51.7	41.7	36.6	43.54	8.1	3	27.2
Ce	171.5	146.5	279	216	265	184	254	185	89	104	89	78	84.1	16.1	6.8	56.2
Pr	18.13	16.28	24.9	19.8	25.9	16.4	23.4	18.1	8.2	9.3	8.8	7.3	8.43	2.1	0.9	8
Nd	64.7	57.6	74.1	60.3	82.5	50.5	74.1	52.2	28	31.5	30.8	25.4	28.86	7.7	3.2	30.1
Sm	9.65	8.68	10.3	8.65	12	7.11	10.4	7	4.39	4.54	4.85	4.02	4.61	2.1	1.2	7
Eu	2.24	1.62	1.82	1.54	2.33	1.43	2.04	1.27	1.1	1.14	1.23	1.04	1.13	0.3	0	0.6
Gd	7.05	6.77	6.86	6	8.37	5.25	7.29	6.87	3.27	3.4	3.6	2.98	3.32	1.9	1	6
Tb	0.9	0.9	0.98	0.82	1.12	0.73	1.05	0.8	0.41	0.42	0.46	0.39	0.42	0.5	0.3	1.1
Dy	4.66	4.8	5.58	4.79	6.5	4	5.53	3.32	2.2	2.23	2.42	1.97	2.26	3.5	2.1	7.4
Ho	0.83	0.83	1.12	0.9	1.29	0.81	1.13	0.63	0.41	0.43	0.47	0.38	0.42	0.7	0.3	1.5
Er	2.11	2.42	3.24	2.68	3.66	2.25	3.23	1.78	1.12	1.16	1.28	0.99	1.14	2.2	1.1	4.5
Tm	0.3	0.36	0.49	0.4	0.54	0.36	0.5	0.27	0.17	0.19	0.2	0.17	0.19	0.4	0.2	0.8
Yb	1.94	2.41	3.19	2.67	3.47	2.3	3.26	1.7	1.14	1.15	1.32	1.04	1.16	3	1.8	5
Lu	0.28	0.36	0.46	0.4	0.52	0.37	0.46	0.21	0.18	0.18	0.19	0.17	0.18	0.4	0.3	0.8
Hf	9.3	6.69	11.6	9.8	11.8	8.7	11.1	8.57	4.3	4.14	3.91	4.12	3.79	2.9	2	5.4
Ta	1.57	1.88	2.8	2.5	3.1	2.3	2.8	1.24	0.77	1.87	2.62	2.86	1.9	3.5	11.3	2.9
Pb	17.9	21.5	61.3	63.8	59	51.8	64.5	28.5	24.4	24.1	28.7	31.4	27.8	27.1	14.6	60.8
Th	10.1	10.8	159	117	107	83.2	116	21.5	12.2	16.8	18.1	18.5	21.68	17.1	10.8	33.5
U	3.34	1.89	15.2	15.8	12.3	7.53	10.3	3.49	2.72	3.8	3.54	3.58	4.23	2.7	4.9	2.6
*LOI--Loss on ignition
